# Supplementary material for: Divergence in function and expression of the NOD26-like intrinsic proteins in plants
Source: PubMed Central journal article supplement (PMC2726226; doi:10.1186/1471-2164-10-313), 2009-07-15
Supplement: 1471-2164-10-313-S1.pdf [file 1471-2164-10-313-S1.pdf]

Additional file 1

**(A) List of *NIP* genes in plants**

| NIPs     | Protein ID | Gene ID  | Chromosome | Gene length | CDS length | AA length | Gene structure | cDNA     | NPA motif1 | NPA motif2 | ar/R filter | Reference |
|----------|------------|----------|------------|-------------|------------|-----------|----------------|----------|------------|------------|-------------|-----------|
| OsNIP1;1 | BAD27715   | AP004070 | 2          | 2994        | 855        | 284       |                | AK068806 | NPA        | NPA        | W, V, A, R  | 1,3,4     |
| OsNIP1;2 | BAD73177   | AP003105 | 1          | 3547        | 912        | 303       |                |          | NPA        | NPA        | W, V, A, R  | 1,3       |
| OsNIP1;3 | AAV44140   | AC135918 | 5          | 4553        | 861        | 286       |                | AK062320 | NPA        | NPA        | W, V, A, R  | 1,3       |
| OsNIP1;4 | BAD53665   | AP003682 | 6          | 1113        | 822        | 273       |                |          | NPA        | NPA        | W, V, A, R  | 1,3       |
| OsNIP2;1 | BAD16128   | AP005297 | 2          | 3609        | 897        | 298       |                | AK069842 | NPA        | NPA        | G, S, G, R  | 1-4,8,13  |
| OsNIP2;2 | BAD37471   | AP003569 | 6          | 4567        | 897        | 298       |                | AK112022 | NPA        | NPA        | G, S, G, R  | 1,3,4,13  |
| OsNIP3;1 | AAG13499   | AC068924 | 10         | 1573        | 726        | 241       |                |          | NPS        | NPV        | A, I, G, R  | 1,3,4     |
| OsNIP3;2 | BAC99758   | AP005467 | 8          | 1366        | 918        | 305       |                |          | NPA        | NPA        | A, A, A, R  | 1,3,8     |
| OsNIP3;3 | BAC65382   | AP005467 | 8          | 1426        | 837        | 278       |                |          | NPA        | NPA        | A, I, A, R  | 1,3       |
| OsNIP3;5 | BAC98553   | AP004461 | 8          | 3021        | 852        | 283       |                |          | NPA        | NPA        | A, A, P, R  | 1,3       |
| OsNIP4;1 | BAB61180   | AP003219 | 1          | 1124        | 861        | 286       |                | AK106825 | NPA        | NPA        | C, G, G, R  | 1,3       |
| ZmNIP1;1 | AAK26750   | AF326483 | AC215509.2 | 1852        | 849        | 282       |                | AF326483 | NPA        | NPA        | W, V, A, R  | 5         |
| ZmNIP2;1 | AAK26751   | AF326484 | AC196472.2 | 3103        | 888        | 295       |                | AF326484 | NPA        | NPA        | G, S, G, R  | 5         |
| ZmNIP2;2 | AAK26752   | AF326485 | AC206502.3 | 3272        | 885        | 294       |                | AF326485 | NPA        | NPA        | G, S, G, R  | 5         |
| ZmNIP2;3 | AAK26849   | AF342810 | AC216219.3 | 3088        | 906        | 301       |                | AF342810 | NPA        | NPA        | G, S, G, R  | 5         |
| ZmNIP3;1 | AAK26753   | AF326486 | AC209805.3 | 2752        | 909        | 302       |                | AF326486 | NPS        | NPV        | A, I, G, R  | 5         |
| AtNIP1;1 | CAA16760   | AL021711 | 4          | 1681        | 927        | 308       |                |          | NPA        | NPG        | W, V, A, R  | 6,7,9     |
| AtNIP1;2 | CAA16748   | AL021711 | 4          | 1968        | 885        | 294       |                |          | NPA        | NPG        | W, V, A, R  | 6,7,9     |
| AtNIP2;1 | AAC26712   | AC004077 | 2          | 1176        | 867        | 288       |                |          | NPA        | NPA        | W, V, A, R  | 6,7,11,12 |
| AtNIP3;1 | AAG50717   | AC079041 | 1          | 1124        | 810        | 269       |                |          | NPA        | NPA        | W, I, A, R  | 6,7       |
| AtNIP4;1 | BAB10360   | AB016873 | 5          | 2575        | 852        | 283       |                |          | NPA        | NPA        | W, V, A, R  | 6,7       |
| AtNIP4;2 | BAB10361   | AB016873 | 5          | 1281        | 852        | 283       |                |          | NPA        | NPA        | W, V, A, R  | 6,7       |
| AtNIP5;1 | CAB39791   | AL049488 | 4          | 2980        | 915        | 304       |                |          | NPS        | NPV        | A, I, G, R  | 6-9       |
| AtNIP6;1 | AAF14664   | AC011713 | 1          | 1375        | 918        | 305       |                |          | NPA        | NPV        | A, I, A, R  | 6-8       |
| AtNIP7;1 | AAF30303   | AC018907 | 3          | 1546        | 825        | 274       |                |          | NPS        | NPA        | A, V, G, R  | 6,7,14    |

|          |              |          |              |      |     |     |     |          |     |     |            |    |
|----------|--------------|----------|--------------|------|-----|-----|-----|----------|-----|-----|------------|----|
| CpNIP2;1 | CAD67694     | AJ544830 | ---          | ---  | 867 | 288 | --- | AJ544830 | NPA | NPV | G, S, G, R |    |
| CaNIP2;1 | CAG34223     | AJ746344 | ---          | ---  | 822 | 273 | --- | AJ746344 | NPA | NPA | G, S, G, R |    |
| VuNIP1;1 | ABS72446     | EF514501 | ---          | ---  | 822 | 273 | --- | EF514501 | NPA | NPV | W, V, A, R |    |
| LjNIP6;1 | ABY19374     | EU294215 | ---          | ---  | 942 | 313 | --- | EU294215 | NPA | NPV | T, I, A, R | 8  |
| MtNIP2   | AAS48064     | AC152446 | ---          | 2018 | 810 | 269 |     | AY539750 | NPA | NPA | W, V, A, R | 10 |
| AnNIP1;1 | AAQ11826     | AF544251 | ---          | ---  | 903 | 300 | --- | AF544251 | NPS | NPV | A, I, A, R |    |
| PpNIP3;1 | 94322        | 94322    | Scaffold_258 | 1732 | 906 | 301 |     |          | NPA | NPV | A, I, A, R | 15 |
| PpNIP5;1 | 115513       | 115513   | Scaffold_13  | 1272 | 687 | 228 |     |          | NPA | NPA | F, A, A, R | 15 |
| PpNIP5;2 | 186237       | 186237   | Scaffold_91  | 1617 | 714 | 237 |     |          | NPA | NPA | F, A, A, R | 15 |
| PpNIP5;3 | 179749       | 179749   | Scaffold_37  | 2505 | 696 | 231 |     |          | NPA | NPA | F, A, A, R | 15 |
| SbNIP1;1 | 4882657      | 5111844  | 4            | 2861 | 864 | 287 |     |          | NPA | NPA | W, V, A, R |    |
| SbNIP1;2 | 4804466      | 5033653  | 3            | 1091 | 816 | 271 |     |          | NPA | NPA | W, V, A, R |    |
| SbNIP1;3 | 5060249      | 5289436  | 9            | 3306 | 852 | 283 |     |          | NPA | NPA | W, V, A, R |    |
| SbNIP2;1 | 4757201      | 4986388  | 4            | 3781 | 894 | 297 |     |          | NPA | NPA | G, S, G, R |    |
| SbNIP2;2 | 149942       | 149942   | 10           | 4774 | 888 | 295 |     |          | NPA | NPA | G, S, G, R |    |
| SbNIP3;1 | 4742451      | 4971638  | 1            | 4668 | 906 | 301 |     |          | NPS | NPV | A, I, G, R |    |
| SbNIP3;2 | 5043039      | 5272226  | 7            | 1187 | 894 | 297 |     |          | NPA | NPA | A, A, A, R |    |
| SbNIP3;3 | 4840652      | 5069839  | 7            | 907  | 870 | 289 |     |          | NPA | NPA | A, A, A, R |    |
| SbNIP3;5 | 5043032      | 5272219  | 7            | 1078 | 894 | 297 |     |          | NPA | NPA | A, A, P, R |    |
| PtNIP2;1 | 577637       | 577637   | XVII         | 3290 | 837 | 278 |     |          | NPA | NPA | G, S, G, R |    |
| PtNIP4;1 | 566501       | 566501   | X            | 1433 | 792 | 263 |     |          | NPA | NPA | W, V, A, R |    |
| PtNIP4;2 | 756079       | 756079   | II           | 2042 | 840 | 279 |     |          | NPA | NPA | W, V, A, R |    |
| PtNIP5;1 | 708017       | 708017   | I            | 4931 | 900 | 299 |     |          | NPS | NPV | A, I, G, R |    |
| PtNIP5;2 | 823094       | 823094   | XI           | 3914 | 903 | 300 |     |          | NPS | NPV | A, I, G, R |    |
| PtNIP6;1 | 757987       | 757987   | III          | 2410 | 912 | 303 |     |          | NPS | NPV | S, I, A, R |    |
| PtNIP6;2 | 797136       | 797136   | I            | 2848 | 912 | 303 |     |          | NPS | NPV | T, I, A, R |    |
| PtNIP7;1 | 803915       | 803915   | VIII         | 2253 | 729 | 242 |     |          | NPA | NPA | A, V, G, R |    |
| GmNIP1;1 | Gm0003x00182 | —        | Scaffold_3   | 4078 | 732 | 243 |     |          | NPA | NPV | W, V, A, R |    |
| GmNIP1;3 | Gm0022x00351 | —        | Scaffold_22  | 3302 | 816 | 271 |     |          | NPA | NPA | W, V, A, R |    |

|           |              |              |                |       |      |     |     |              |     |     |            |  |
|-----------|--------------|--------------|----------------|-------|------|-----|-----|--------------|-----|-----|------------|--|
| GmNIP1;4  | Gm0022x00350 | —            | Scaffold_22    | 2387  | 825  | 274 |     |              | NPA | NPA | W, V, A, R |  |
| GmNIP1;5  | Gm0003x00181 | —            | Scaffold_3     | 2100  | 813  | 270 |     |              | NPA | NPA | W, V, A, R |  |
| GmNIP1;6  | Gm0030x00284 | —            | Scaffold_30    | 2434  | 822  | 273 |     |              | NPA | NPA | W, V, A, R |  |
| GmNIP2;1  | Gm0021x00508 | —            | Scaffold_21    | 5064  | 888  | 295 |     |              | NPA | NPA | G, S, G, R |  |
| GmNIP3;1  | Gm0131x00049 | —            | Scaffold_131   | 5663  | 912  | 303 |     |              | NPS | NPV | A, I, G, R |  |
| GmNIP6;1  | Gm0088x00395 | —            | Scaffold_88    | 3652  | 915  | 304 |     |              | NPA | NPV | T, I, G, R |  |
| GmNIP6;2  | Gm0113x00121 | —            | Scaffold_113   | 4120  | 921  | 306 |     |              | NPA | NPV | N, I, S, R |  |
| PitNIP1;1 | —            | TA9262_3352  | ---            | 1290  | 819  | 272 | --- |              | NPA | NPA | W, V, A, R |  |
| PitNIP1;2 | —            | TA21380_3352 | ---            | 1330  | 789  | 262 | --- |              | NPA | NPA | W, V, A, R |  |
| PitNIP1;3 | —            | TA13914_3352 | ---            | 816   | 714  | 237 | --- |              | NPA | NPA | W, V, A, R |  |
| PitNIP1;4 | —            | AY055751     | ---            | 1065  | 795  | 264 | --- |              | NPA | NPA | W, V, A, R |  |
| PitNIP2;1 | —            | TA24411_3352 | ---            | 904   | 681  | 226 | --- |              | NPA | NPA | S, S, G, R |  |
| PitNIP3;1 | —            | TA8714_3352  | ---            | 1752  | 885  | 294 | --- |              | NPS | NPV | G, I, G, R |  |
| PitNIP3;2 | —            | TA16960_3352 | ---            | 1770  | 912  | 303 | --- |              | NPA | NPV | S, I, G, R |  |
| VvNIP1;1  | CAO48005     | CU459298     | 10             | 1891  | 789  | 262 |     |              | NPA | NPA | W, V, A, R |  |
| VvNIP2;1  | CAO15462     | CU461115     | Scaffold_2214  | 2268  | 738  | 245 |     |              | NPA | NPA | G, S, G, R |  |
| VvNIP4;1  | CAO70192     | CU459401     | Scaffold_184   | 37269 | 741  | 246 |     |              | NPA | NPA | W, V, A, R |  |
| VvNIP5;1  | CAO62847     | CU459322     | 2              | 3306  | 897  | 298 |     |              | NPS | NPV | A, I, G, R |  |
| VvNIP6;1  | CAO45476     | CU459286     | Scaffold_69    | 2268  | 1065 | 354 |     |              | NPA | NPV | T, I, A, R |  |
| VvNIP7;1  | CAO71103     | CU459219     | 5              | 1263  | 882  | 293 |     |              | NPS | NPA | G, V, G, R |  |
| CsNIP1;1  | —            | —            | Scaffold000020 | 1518  | 831  | 276 |     |              | NPA | NPA | W, V, A, R |  |
| CsNIP2;1  | —            | —            | Scaffold002257 | 4156  | 867  | 288 |     |              | NPA | NPV | G, S, G, R |  |
| CsNIP2;2  | —            | —            | Scaffold001348 | 2898  | 786  | 261 |     |              | NPA | NPA | C, S, G, R |  |
| CsNIP4;2  | —            | —            | Scaffold000444 | 3817  | 810  | 269 |     |              | NPA | NPA | W, V, A, R |  |
| CsNIP5;1  | —            | —            | Scaffold000511 | 4801  | 897  | 298 |     |              | NPS | NPV | A, I, G, R |  |
| CsNIP6;1  | —            | —            | Scaffold000151 | 2347  | 915  | 304 |     |              | NPA | NPV | T, V, A, R |  |
| CsNIP7;1  | —            | —            | Scaffold000085 | 1595  | 603  | 200 |     |              | NPA | NPA | A, V, A, R |  |
| galgaNIP  | XP_001420576 | XM_001420539 | 12             | 949   | 813  | 270 |     | XM_001420539 | NPS | NAA | Y, L, G, R |  |

Note: The “—” indicates that no accession number was assigned to the corresponding genes in the GenBank database at present. “---” indicates that the corresponding data is

unavailable now. The predicted protein and nucleotide sequences of SbNIPs, PtNIPs, GmNIPs, and VvNIPs were downloaded from JGI (<http://genome.jgi-psf.org>). The *Cucumis sativus* NIPs were personally communicated with the Chinese Academy of Agricultural Sciences. To identify the species of origin for each NIP, a species acronym is included before the protein name: An, *Atriplex nummularia*; At, *Arabidopsis thaliana*; Ca, *Cicer arietinum*; Cp, *Cucurbita pepo*; Cs, *Cucumis sativus*; galga, *Ostreococcus lucimarinus*; Gm, *Glycine max*; Lj, *Lotus japonicus*; Mt, *Medicago truncatula*; Os, *Oryza sativa*; Pit, *Pinus taeda*; Pp, *Physcomitrella patens*; Pt, *Populus trichocarpa*; Sb, *Sorghum bicolor*; Vu, *Vigna unguiculata*; Vv, *Vitis vinifera*; Zm, *Zea mays*.

References cited in this table:

1. Bansal A, Sankararamkrishnan R: **Homology modeling of major intrinsic proteins in rice, maize and *Arabidopsis*: comparative analysis of transmembrane helix association and aromatic/arginine selectivity filters.** *BMC Struct Biol* 2007, **7**:27.
2. Ma JF, Tamai K, Yamaji N, Mitani N, Konishi S, Katsuhara M, Ishiguro M, Murata Y, Yano M: **A silicon transporter in rice.** *Nature* 2006, **440**:688-691.
3. Sakurai J, Ishikawa F, Yamaguchi T, Uemura M, Maeshima M: **Identification of 33 rice aquaporin genes and analysis of their expression and function.** *Plant Cell Physiol* 2005, **46**:1568-1577.
4. Mitani N, Yamaji N, Ma JF: **Characterization of substrate specificity of a rice silicon transporter, Lsi1.** *Pflügers Arch – Eur J Physiol* 2008, **456**:679-686.
5. Chaumont F, Barrieu F, Wojcik E, Chrispeels MJ, Jung R: **Aquaporins constitute a large and highly divergent protein family in maize.** *Plant Physiol* 2001, **125**:1206-1215.
6. Quigley F, Rosenberg JM, Shachar-Hill Y, Bohnert HJ: **From genome to function: the *Arabidopsis* aquaporins.** *Genome Biol* 2001, **3**(1):research0001.1-0001.17.
7. Johanson U, Karlsson M, Johansson I, Gustavsson S., Sjövall S, Fraysse L, Weig AR, Kjellbom P: **The complete set of genes encoding major intrinsic proteins in *Arabidopsis* provides a framework for a new nomenclature for major intrinsic proteins in plants.** *Plant Physiol* 2001, **126**:1358-1369.
8. Bienert GP, Thorsen M, Schüssler MD, Nilsson HR, Wagner A, Tamás MJ, Jahn TP: **A subgroup of plant aquaporins facilitate the bi-directional diffusion of As(OH)<sub>3</sub> and Sb(OH)<sub>3</sub> across membranes.** *BMC Biol* 2008, **6**:26.
9. Kamiya T, Tanaka M, Mitani N, Ma JF, Maeshima M, Fujiwara T: ***NIP1;1*, an aquaporin homolog, determines the arsenite sensitivity of *Arabidopsis thaliana*.** *J Biol Chem*

2009, **284**:2114-2120.

10. Fortin MG, Morrison NA, Verma DP: **Nodulin-26, a peribacteroid membrane nodulin is expressed independently of the development of the peribacteroid compartment.** *Nucleic Acids Res* 1987, **15**:813-824.
11. Choi WG, Roberts DM: ***Arabidopsis* NIP2;1, a major intrinsic protein transporter of lactic acid induced by anoxic stress.** *J Biol Chem* 2007, **282**:24209-24218.
12. Mizutani M, Watanabe S, Nakagawa T, Maeshima M: **Aquaporin NIP2;1 is mainly localized to the ER membrane and shows root-specific accumulation in *Arabidopsis thaliana*.** *Plant Cell Physiol* 2006, **47**:1420-1426.
13. Ma JF, Yamaji N, Mitani N, Xu XY, Su YH, McGrath SP, Zhao FJ: **Transporters of arsenite in rice and their role in arsenic accumulation in rice grain.** *Proc Natl Acad Sci USA* 2008, **105**:9931-9935.
14. Isayenkov SV, Maathuis FJM: **The *Arabidopsis thaliana* aquaglyceroporin AtNIP7;1 is a pathway for arsenite uptake.** *FEBS Lett* 2008, **582**:1625-1628.
15. Danielson JÅH, Johanson U: **Unexpected complexity of the aquaporin gene family in the moss *Physcomitrella patens*.** *BMC Plant Biol* 2008, **8**:45.

**(B) The exon/intron lengths for each *NIP* gene in plants**

| NIPs     | Exon1 | Intron1 | Exon2 | Intron2 | Exon3 | Intron3 | Exon4 | Intron4 | Exon5 | Intron5 | Exon6 |
|----------|-------|---------|-------|---------|-------|---------|-------|---------|-------|---------|-------|
| OsNIP1;1 | 146   | 95      | 422   | 184     | 61    | 1364    | 222   |         |       |         |       |
| OsNIP1;2 | 159   | 931     | 259   | 1269    | 215   | 85      | 61    | 355     | 213   |         |       |
| OsNIP1;3 | 164   | 621     | 422   | 1709    | 61    | 1366    | 210   |         |       |         |       |
| OsNIP1;4 | 173   | 111     | 419   | 74      | 61    | 110     | 165   |         |       |         |       |
| OsNIP2;1 | 149   | 143     | 224   | 1606    | 194   | 105     | 61    | 350     | 264   |         |       |
| OsNIP2;2 | 158   | 159     | 224   | 2094    | 194   | 113     | 61    | 713     | 255   |         |       |
| OsNIP3;1 | 41    | 199     | 487   | 651     | 195   |         |       |         |       |         |       |
| OsNIP3;2 | 287   | 104     | 419   | 114     | 61    | 234     | 147   |         |       |         |       |
| OsNIP3;3 | 206   | 373     | 419   | 98      | 61    | 122     | 147   |         |       |         |       |
| OsNIP3;5 | 251   | 768     | 389   | 1303    | 61    | 102     | 147   |         |       |         |       |
| OsNIP4;1 | 173   | 106     | 686   |         |       |         |       |         |       |         |       |
| ZmNIP1;1 | 134   | 186     | 422   | 93      | 61    | 728     | 228   |         |       |         |       |
| ZmNIP2;1 | 143   | 156     | 224   | 1581    | 194   | 113     | 61    | 370     | 261   |         |       |
| ZmNIP2;2 | 158   | 134     | 224   | 2036    | 194   | 124     | 61    | 98      | 243   |         |       |
| ZmNIP2;3 | 167   | 120     | 224   | 1386    | 194   | 117     | 61    | 564     | 255   |         |       |
| ZmNIP3;1 | 224   | 1598    | 425   | 119     | 61    | 130     | 195   |         |       |         |       |
| AtNIP1;1 | 167   | 113     | 224   | 425     | 218   | 116     | 97    | 105     | 216   |         |       |
| AtNIP1;2 | 158   | 134     | 224   | 712     | 218   | 138     | 61    | 104     | 219   |         |       |
| AtNIP2;1 | 146   | 128     | 440   | 81      | 61    | 104     | 216   |         |       |         |       |
| AtNIP3;1 | 194   | 237     | 280   | 80      | 333   |         |       |         |       |         |       |
| AtNIP4;1 | 131   | 109     | 224   | 461     | 197   | 664     | 61    | 494     | 234   |         |       |
| AtNIP4;2 | 131   | 107     | 224   | 135     | 197   | 88      | 61    | 104     | 234   |         |       |
| AtNIP5;1 | 236   | 1726    | 419   | 265     | 61    | 78      | 195   |         |       |         |       |
| AtNIP6;1 | 242   | 97      | 224   | 207     | 194   | 78      | 61    | 80      | 192   |         |       |
| AtNIP7;1 | 140   | 177     | 224   | 237     | 183   | 211     | 72    | 101     | 201   |         |       |
| MtNIP2   | 116   | 94      | 230   | 461     | 199   | 357     | 62    | 291     | 208   |         |       |
| PpNIP3;1 | 231   | 147     | 225   | 151     | 195   | 437     | 62    | 92      | 193   |         |       |

|          |     |      |     |      |     |      |     |     |     |  |  |
|----------|-----|------|-----|------|-----|------|-----|-----|-----|--|--|
| PpNIP5;1 | 228 | 207  | 195 | 232  | 61  | 147  | 202 |     |     |  |  |
| PpNIP5;2 | 255 | 227  | 195 | 244  | 61  | 147  | 202 |     |     |  |  |
| PpNIP5;3 | 246 | 195  | 195 | 140  | 61  | 154  | 190 |     |     |  |  |
| PpNIP6;1 | 222 | 205  | 192 | 133  | 61  | 122  | 145 |     |     |  |  |
| SbNIP1;1 | 146 | 521  | 422 | 120  | 61  | 940  | 231 |     |     |  |  |
| SbNIP1;2 | 239 | 108  | 203 | 133  | 61  | 134  | 213 |     |     |  |  |
| SbNIP1;3 | 155 | 455  | 422 | 1777 | 61  | 77   | 210 |     |     |  |  |
| SbNIP2;1 | 146 | 158  | 224 | 1753 | 194 | 105  | 61  | 458 | 264 |  |  |
| SbNIP2;2 | 155 | 277  | 224 | 2257 | 194 | 129  | 61  | 755 | 249 |  |  |
| SbNIP3;1 | 221 | 2865 | 425 | 108  | 61  | 75   | 195 |     |     |  |  |
| SbNIP3;2 | 263 | 95   | 419 | 91   | 61  | 111  | 147 |     |     |  |  |
| SbNIP3;3 | 434 | 146  | 61  | 122  | 144 |      |     |     |     |  |  |
| SbNIP3;5 | 683 | 93   | 61  | 94   | 147 |      |     |     |     |  |  |
| PtNIP2;1 | 102 | 253  | 225 | 1465 | 195 | 152  | 61  | 584 | 253 |  |  |
| PtNIP4;1 | 105 | 120  | 222 | 137  | 198 | 280  | 61  | 105 | 205 |  |  |
| PtNIP4;2 | 138 | 106  | 222 | 897  | 198 | 79   | 61  | 121 | 220 |  |  |
| PtNIP5;1 | 209 | 1877 | 420 | 83   | 61  | 1147 | 209 |     |     |  |  |
| PtNIP5;2 | 225 | 2102 | 420 | 245  | 61  | 555  | 196 |     |     |  |  |
| PtNIP6;1 | 225 | 117  | 224 | 90   | 195 | 628  | 61  | 664 | 205 |  |  |
| PtNIP6;2 | 225 | 122  | 225 | 89   | 195 | 1167 | 61  | 559 | 205 |  |  |
| PtNIP7;1 | 24  | 588  | 225 | 96   | 195 | 736  | 61  | 105 | 223 |  |  |
| GmNIP1;1 | 44  | 460  | 224 | 371  | 243 | 2356 | 3   | 164 | 213 |  |  |
| GmNIP1;3 | 116 | 462  | 224 | 376  | 197 | 1443 | 61  | 124 | 213 |  |  |
| GmNIP1;4 | 116 | 181  | 224 | 619  | 197 | 345  | 61  | 247 | 222 |  |  |
| GmNIP1;5 | 116 | 224  | 224 | 470  | 197 | 350  | 61  | 248 | 210 |  |  |
| GmNIP1;6 | 125 | 608  | 224 | 145  | 197 | 339  | 61  | 177 | 210 |  |  |
| GmNIP2;1 | 155 | 373  | 224 | 3068 | 194 | 208  | 61  | 225 | 249 |  |  |
| GmNIP2;2 | 143 | 2926 | 194 | 222  | 61  | 224  | 249 |     |     |  |  |
| GmNIP3;1 | 221 | 4252 | 431 | 74   | 61  | 76   | 195 |     |     |  |  |
