# Supplementary material for: Divergence in function and expression of the NOD26-like intrinsic proteins in plants
Source: PubMed Central journal article supplement (PMC2726226; doi:10.1186/1471-2164-10-313), 2009-07-15
Supplement: 1471-2164-10-313-S2.pdf [file 1471-2164-10-313-S2.pdf]

```

OsNIP2;1 :
ZmNIP2;1 :
SbNIP2;1 :
OsNIP2;2 :
ZmNIP2;2 :
SbNIP2;2 :
ZmNIP2;3 :
CpNIP2;1 :
CsNIP2;1 :
PtNIP2;1 :
CsNIP2;2 :
CaNIP2;1 :
GmNIP2;1 :
OsNIP1;1 :
ZmNIP1;1 :
SbNIP1;1 :
OsNIP1;2 :
SbNIP1;2 :
OsNIP1;3 :
SbNIP1;3 :
AtNIP1;1 :
AtNIP1;2 :
VuNIP1;1 :
GmNIP1;3 :
GmNIP1;6 :
GmNIP1;4 :
GmNIP1;5 :
CsNIP1;1 :
AtNIP4;1 :
AtNIP4;2 :
PtNIP4;2 :
CsNIP4;2 :
PitNIP1;1 :
OsNIP1;4 :
AtNIP2;1 :
ZmNIP3;1 :
SbNIP3;1 :
AtNIP5;1 :
VvNIP5;1 :
CsNIP5;1 :
PtNIP5;1 :
PtNIP5;2 :
GmNIP3;1 :
AnNIP1;1 :
AtNIP6;1 :
PtNIP6;1 :
PtNIP6;2 :
GmNIP6;1 :
GmNIP6;2 :
LjNIP6;1 :
CsNIP6;1 :
VvNIP6;1 :
PtNIP3;1 :
PpNIP3;1 :
PtNIP3;2 :
OsNIP3;2 :
SbNIP3;2 :
OsNIP3;3 :
SbNIP3;3 :
OsNIP3;5 :
SbNIP3;5 :
AtNIP7;1 :
VvNIP7;1 :
OsNIP4;1 :
galgaNip :

```

```

OsNIP2;1 : ---FFPH-----
ZmNIP2;1 : ---FFPH-----
SbNIP2;1 : ---DFFPH-----
OsNIP2;2 : ---DFFPH-----
ZmNIP2;2 : ---DFFPH-----
SbNIP2;2 : ---DFFPH-----
ZmNIP2;3 : ---DFFPH-----
CpNIP2;1 : ---DFFPH-----
CsNIP2;1 : ---DFFPH-----
PtNIP2;1 : ---DFFPH-----
CsNIP2;2 : ---DFFPH-----
CaNIP2;1 : ---DFFPH-----
GmNIP2;1 : ---DFFPH-----
OsNIP1;1 : ---LAFS-----
ZmNIP1;1 : ---MVS-----
SbNIP1;1 : ---MVS-----
OsNIP1;2 : ---DIF-----
SbNIP1;2 : ---DIF-----
OsNIP1;3 : ---DIF-----
SbNIP1;3 : ---DIF-----
AtNIP1;1 : ---LSVS-----
AtNIP1;2 : ---LSIS-----
VuNIP1;1 : ---SFVS-----
GmNIP1;3 : ---SVS-----
GmNIP1;6 : ---NODC-----
GmNIP1;4 : ---SCVN-----
GmNIP1;5 : ---SCVN-----
CsNIP1;1 : ---EWS-----
AtNIP4;1 : ---SPSI-----
AtNIP4;2 : ---SPSI-----
PtNIP4;2 : ---SPAA-----
CsNIP4;2 : ---SNL-----
PitNIP1;1 : ---S-----
OsNIP1;4 : ---MMS-----
AtNIP2;1 : ---LS-----
ZmNIP3;1 : ---AD-----
SbNIP3;1 : ---AD-----
AtNIP5;1 : ---SD-----
VvNIP5;1 : ---AD-----
CsNIP5;1 : ---AD-----
PtNIP5;1 : ---AD-----
PtNIP5;2 : ---SD-----
GmNIP3;1 : ---K-----
AnNIP1;1 : ---K-----
AtNIP6;1 : ---P-----
PtNIP6;1 : ---P-----
PtNIP6;2 : ---P-----
GmNIP6;1 : ---P-----
GmNIP6;2 : ---P-----
LjNIP6;1 : ---S-----
CsNIP6;1 : ---YS-----
VvNIP6;1 : ---P-----
PitNIP3;1 : ---AS-----
PpNIP3;1 : ---SP-----
PitNIP3;2 : ---RAS-----
OsNIP3;2 : ---IK-----
SbNIP3;2 : ---NA-----
OsNIP3;3 : ---IPSS-----
SbNIP3;3 : ---KSM-----
OsNIP3;5 : ---RAKE-----
SbNIP3;5 : ---QTOL-----
AtNIP7;1 : ---YD-----
VvNIP7;1 : ---HNP-----
OsNIP4;1 : ---CAIG-----
galgaNip : ---GKSINA-----

```

```

OsNIP2;1 :
ZmNIP2;1 :
SbNIP2;1 :
OsNIP2;2 :
ZmNIP2;2 :
SbNIP2;2 :
ZmNIP2;3 :
CpNIP2;1 :
CsNIP2;1 :
PtNIP2;1 :
CsNIP2;2 :
CaNIP2;1 :
GmNIP2;1 :
OsNIP1;1 :
ZmNIP1;1 :
SbNIP1;1 :
OsNIP1;2 :
SbNIP1;2 :
OsNIP1;3 :
SbNIP1;3 :
AtNIP1;1 :
AtNIP1;2 :
VuNIP1;1 :
GmNIP1;3 :
GmNIP1;6 :
GmNIP1;4 :
GmNIP1;5 :
CsNIP1;1 :
AtNIP4;1 :
AtNIP4;2 :
PtNIP4;2 :
CsNIP4;2 :
PitNIP1;1 :
OsNIP1;4 :
AtNIP2;1 :
ZmNIP3;1 :
SbNIP3;1 :
AtNIP5;1 :
VvNIP5;1 :
CsNIP5;1 :
PtNIP5;1 :
PtNIP5;2 :
GmNIP3;1 :
AnNIP1;1 :
AtNIP6;1 :
PtNIP6;1 :
PtNIP6;2 :
GmNIP6;1 :
GmNIP6;2 :
LjNIP6;1 :
CsNIP6;1 :
VvNIP6;1 :
PitNIP3;1 :
PpNIP3;1 :
PitNIP3;2 :
OsNIP3;2 :
SbNIP3;2 :
OsNIP3;3 :
SbNIP3;3 :
OsNIP3;5 :
SbNIP3;5 :
AtNIP7;1 :
VvNIP7;1 :
OsNIP4;1 :
galgaNip :

```

```

OsNIP2:1 : SA SA TS A NK
ZmNIP2:1 : SA SA TS A NL
SbNIP2:1 : SA SA TS A NV
OsNIP2:2 : SA SA TS A NV
ZmNIP2:2 : SA SA TS A NV
SbNIP2:2 : SA SA TS A NV
ZmNIP2:3 : SA SA TS A NV
CpNIP2:1 : SA SA TS A NV
CsNIP2:1 : SA SA TS A NV
PtNIP2:1 : SA SA TS A NV
CsNIP2:2 : SA SA TS A NV
CaNIP2:1 : SA SA TS A NV
GmNIP2:1 : SA SA TS A NV
OsNIP1:1 : SA SA TS A NV
ZmNIP1:1 : SA SA TS A NV
SbNIP1:1 : SA SA TS A NV
OsNIP1:2 : SA SA TS A NV
SbNIP1:2 : SA SA TS A NV
OsNIP1:3 : SA SA TS A NV
SbNIP1:3 : SA SA TS A NV
AtNIP1:1 : SA SA TS A NV
AtNIP1:2 : SA SA TS A NV
VuNIP1:1 : SA SA TS A NV
GmNIP1:3 : SA SA TS A NV
GmNIP1:6 : SA SA TS A NV
GmNIP1:4 : SA SA TS A NV
GmNIP1:5 : SA SA TS A NV
CsNIP1:1 : SA SA TS A NV
AtNIP4:1 : SA SA TS A NV
AtNIP4:2 : SA SA TS A NV
PtNIP4:2 : SA SA TS A NV
CsNIP4:2 : SA SA TS A NV
PitNIP1:1 : SA SA TS A NV
OsNIP1:4 : SA SA TS A NV
AtNIP2:1 : SA SA TS A NV
ZmNIP3:1 : SA SA TS A NV
SbNIP3:1 : SA SA TS A NV
AtNIP5:1 : SA SA TS A NV
VvNIP5:1 : SA SA TS A NV
CsNIP5:1 : SA SA TS A NV
PtNIP5:1 : SA SA TS A NV
PtNIP5:2 : SA SA TS A NV
GmNIP3:1 : SA SA TS A NV
AnNIP1:1 : SA SA TS A NV
AtNIP6:1 : SA SA TS A NV
PtNIP6:1 : SA SA TS A NV
PtNIP6:2 : SA SA TS A NV
GmNIP6:1 : SA SA TS A NV
GmNIP6:2 : SA SA TS A NV
LjNIP6:1 : SA SA TS A NV
CsNIP6:1 : SA SA TS A NV
VvNIP6:1 : SA SA TS A NV
PitNIP3:1 : SA SA TS A NV
PpNIP3:1 : SA SA TS A NV
PitNIP3:2 : SA SA TS A NV
OsNIP3:2 : SA SA TS A NV
SbNIP3:2 : SA SA TS A NV
OsNIP3:3 : SA SA TS A NV
SbNIP3:3 : SA SA TS A NV
OsNIP3:5 : SA SA TS A NV
SbNIP3:5 : SA SA TS A NV
AtNIP7:1 : SA SA TS A NV
VvNIP7:1 : SA SA TS A NV
OsNIP4:1 : SA SA TS A NV
galgaNip : SA SA TS A NV

```

```

OsNIP2;1 : -----L L F I L R O I A D V E E N
ZmNIP2;1 : -----L L F I L R O I A D V E E N
SbNIP2;1 : -----L L F I L R O I A D V E E N
OsNIP2;2 : -----L L F I L R O I A D E F M
ZmNIP2;2 : -----L L F I L R O I A D E F M
SbNIP2;2 : -----L L F I L R O I A D E F M
ZmNIP2;3 : -----L L F I L R O I A D E F M
CpNIP2;1 : -----S F S L S R S D V G G E R
CsNIP2;1 : -----S F S L S R S D V G G E H
PtNIP2;1 : -----P S F G L R R A A D R Q S P S M G P L D A F
CsNIP2;2 : -----
CaNIP2;1 : -----L H H E M L G I E L V G K D L Q C S
GmNIP2;1 : -----S I G S V Q S I G G E R Q K L O R C L
OsNIP1;1 : -----G L L M S N M S
ZmNIP1;1 : -----T L T S M A A S A
SbNIP1;1 : -----T L T S M A A S A
OsNIP1;2 : -----A L R S S R S
SbNIP1;2 : -----G L A T G S
OsNIP1;3 : -----A L T R A
SbNIP1;3 : -----S L V V R A
AtNIP1;1 : -----G L V V R I G S
AtNIP1;2 : -----G L V V R N G S R
VuNIP1;1 : -----A L G V G G T R
GmNIP1;3 : -----A L G L K
GmNIP1;6 : -----A L G S E M E
GmNIP1;4 : -----T L G V G C S R
GmNIP1;5 : -----A L G V L S R
CsNIP1;1 : -----A L G Q S K G S
AtNIP4;1 : -----A L A V S P H K C S S K T
AtNIP4;2 : -----A L A V L Q K N A K S D C
PtNIP4;2 : -----G L G S N Y A S
CsNIP4;2 : -----T L G T H
PitNIP1;1 : -----G L Q G P R
OsNIP1;4 : -----D
AtNIP2;1 : -----C L H R L D D L P L
ZmNIP3;1 : -----
SbNIP3;1 : -----
AtNIP5;1 : -----
VvNIP5;1 : -----
CsNIP5;1 : -----
PtNIP5;1 : -----
PtNIP5;2 : -----
GmNIP3;1 : -----
AnNIP1;1 : -----
AtNIP6;1 : -----
PtNIP6;1 : -----A
PtNIP6;2 : -----
GmNIP6;1 : -----
GmNIP6;2 : -----N
LjNIP6;1 : -----N H
CsNIP6;1 : -----
VvNIP6;1 : -----M
PitNIP3;1 : -----
PpNIP3;1 : -----
PitNIP3;2 : -----
OsNIP3;2 : -----
SbNIP3;2 : -----
OsNIP3;3 : -----
SbNIP3;3 : -----
OsNIP3;5 : -----
SbNIP3;5 : -----
AtNIP7;1 : -----S V S I L
VvNIP7;1 : -----N L L N A F
OsNIP4;1 : -----V A C G T S G I G
galgaNip : -----A

```

Additional file 2 The multiple alignments of plant NIP protein sequences. These sequences were aligned using the program L-INS-i implemented in MAFFT v6.6. The alignments were shaded in the “Quantify Mode”, and the residues were displayed in the “Difference Mode” with the “Diff/Consensus Line” style. Dots and “-“ indicate similar residues and gaps on the alignment respectively.
